# Supplementary material for: Adenine base editing reduces misfolded protein accumulation and toxicity in alpha-1 antitrypsin deficient patient iPSC-hepatocytes
Source: PubMed Central journal article supplement — Mol Ther. 2021 Jul 2;29(11):3219–29. doi: 10.1016/j.ymthe.2021.06.021 (PMC8571173; doi:10.1016/j.ymthe.2021.06.021), 2021-07-02
Supplement: mmc1.pdf [file mmc1.pdf]

**Supplemental information**

**Adenine base editing reduces misfolded  
protein accumulation and toxicity in alpha-1  
antitrypsin deficient patient iPSC-hepatocytes**

**Rhiannon B. Werder, Joseph E. Kaserman, Michael S. Packer, Jonathan Lindstrom-Vautrin, Carlos Villacorta-Martin, Lauren E. Young, Yvonne Aratyn-Schaus, Francine Gregoire, and Andrew A. Wilson**

## Supplemental Figure 1

**A**

| Code name  | TadA | TadA variant                    | PAM variant | Template |
|------------|------|---------------------------------|-------------|----------|
| ngcABEvar1 | Dual | TadA_7.10                       | MQKSER      | pMSP640  |
| ngcABEvar2 | Dual | TadA_7.10                       | Cas9-NG     | pMSP641  |
| ngcABEvar3 | Dual | TadA_7.10                       | MQKFRAER    | pMSP642  |
| ngcABEvar4 | Dual | TadA_7.10+V82S                  | MQKFRAER    | pMSP643  |
| ngcABEvar5 | Mono | TadA_7.10+V82S                  | MQKFRAER    | pMSP510  |
| ngcABEvar6 | Mono | TadA_7.10+I76Y+V82S             | MQKFRAER    | pPMSP591 |
| ngcABEvar7 | Mono | TadA_7.10+V82T                  | MQKFRAER    | pMSP592  |
| ngcABEvar8 | Mono | TadA_7.10+I76Y+V82T             | MQKFRAER    | pMSP623  |
| ngcABEvar9 | Mono | TadA_7.10+I76Y+V82T+Y147T+Q154S | MQKFRAER    | pMSP661  |

**B**

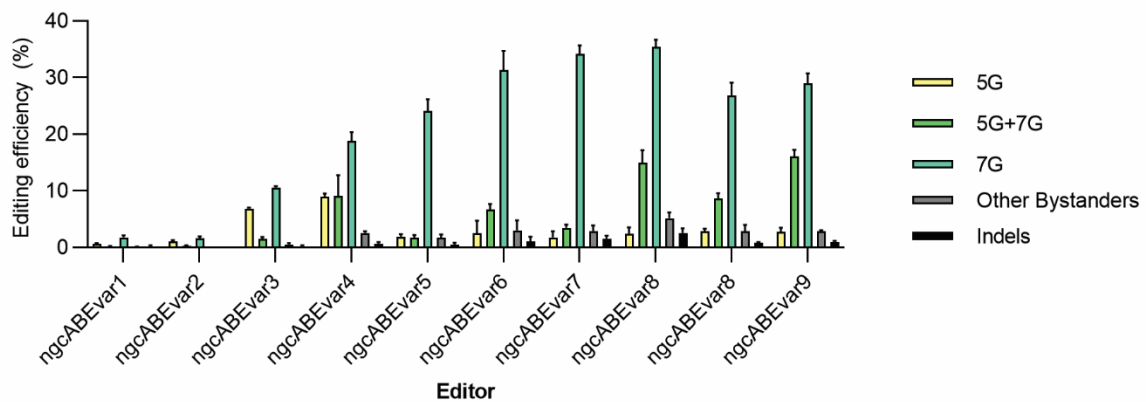

**C**

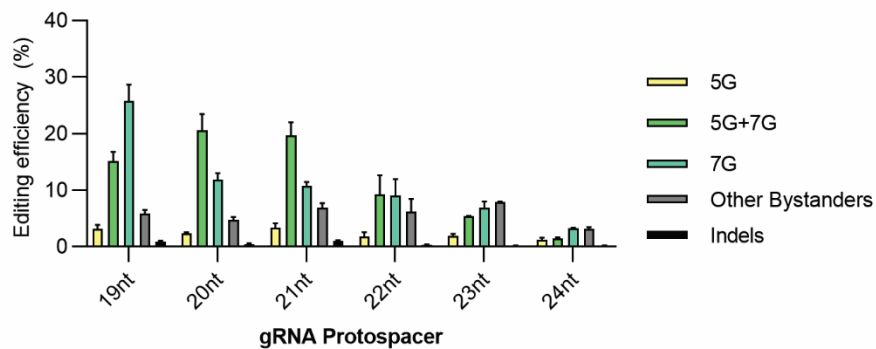

S

**Figure S1.** (A) Details of ngcABEvar1-9. (B) Editing efficiency in patient-derived PiZ homozygous fibroblasts. (C) Editing efficiency with gRNAs of differing protospacer length.

## Supplemental Figure 2

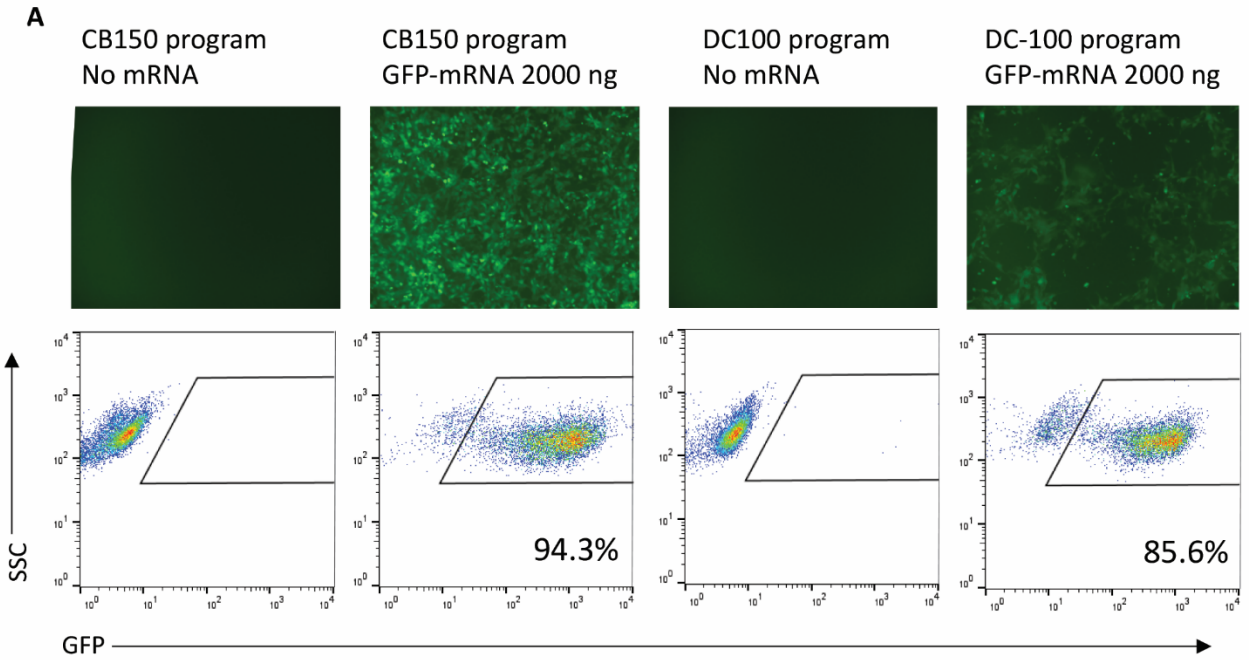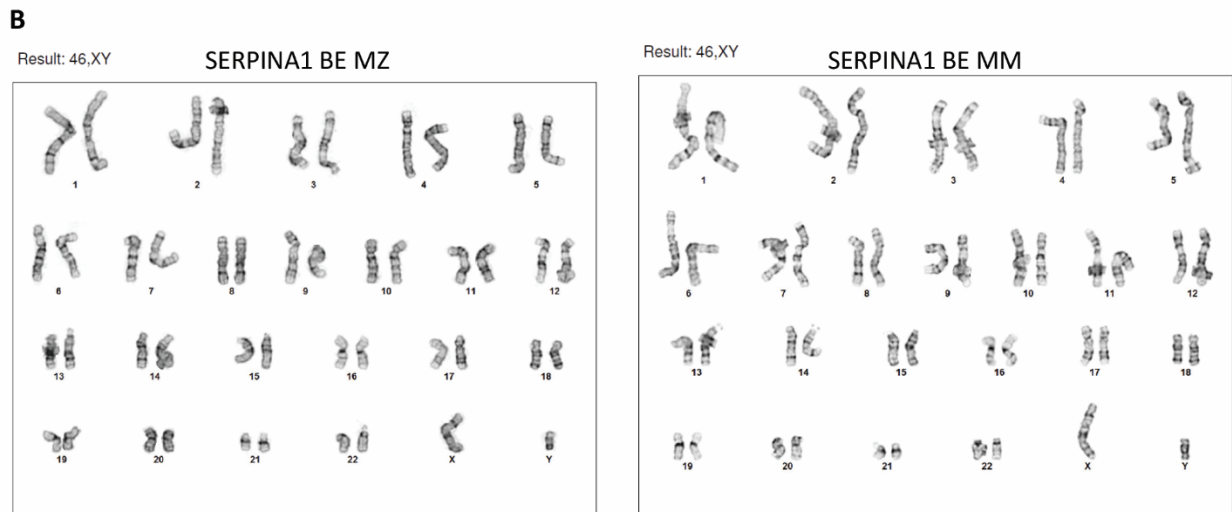

**C**

| sample       | # somatic variants | # A->G | fraction A->G |
|--------------|--------------------|--------|---------------|
| PiZZ1_MZ     | 428                | 57     | 0.133         |
| PiZZ1_MM     | 341                | 45     | 0.132         |
| PiZZ1_ZZ_P34 | 68                 | 16     | 0.235         |

**Figure S2.** Relates to Figure 1. (A) Delivery of GFP-mRNA to iPSCs with nucleofector program CB150 or DC100. GFP fluorescence was determined using a Keyence microscope (top) and by flow cytometry (bottom). (B) Karyotype for MZ and MM corrected iPSCs. (C) Additional analysis of WGS using the LoFreq tool to determine somatic mutations and overlaid with potential off-target sites (determined with Cas-OFFinder). MZ and MM samples were compared to passage matched ZZ cells. Earlier passage ZZ cells (P34) were also assessed.

Supplemental Figure 3

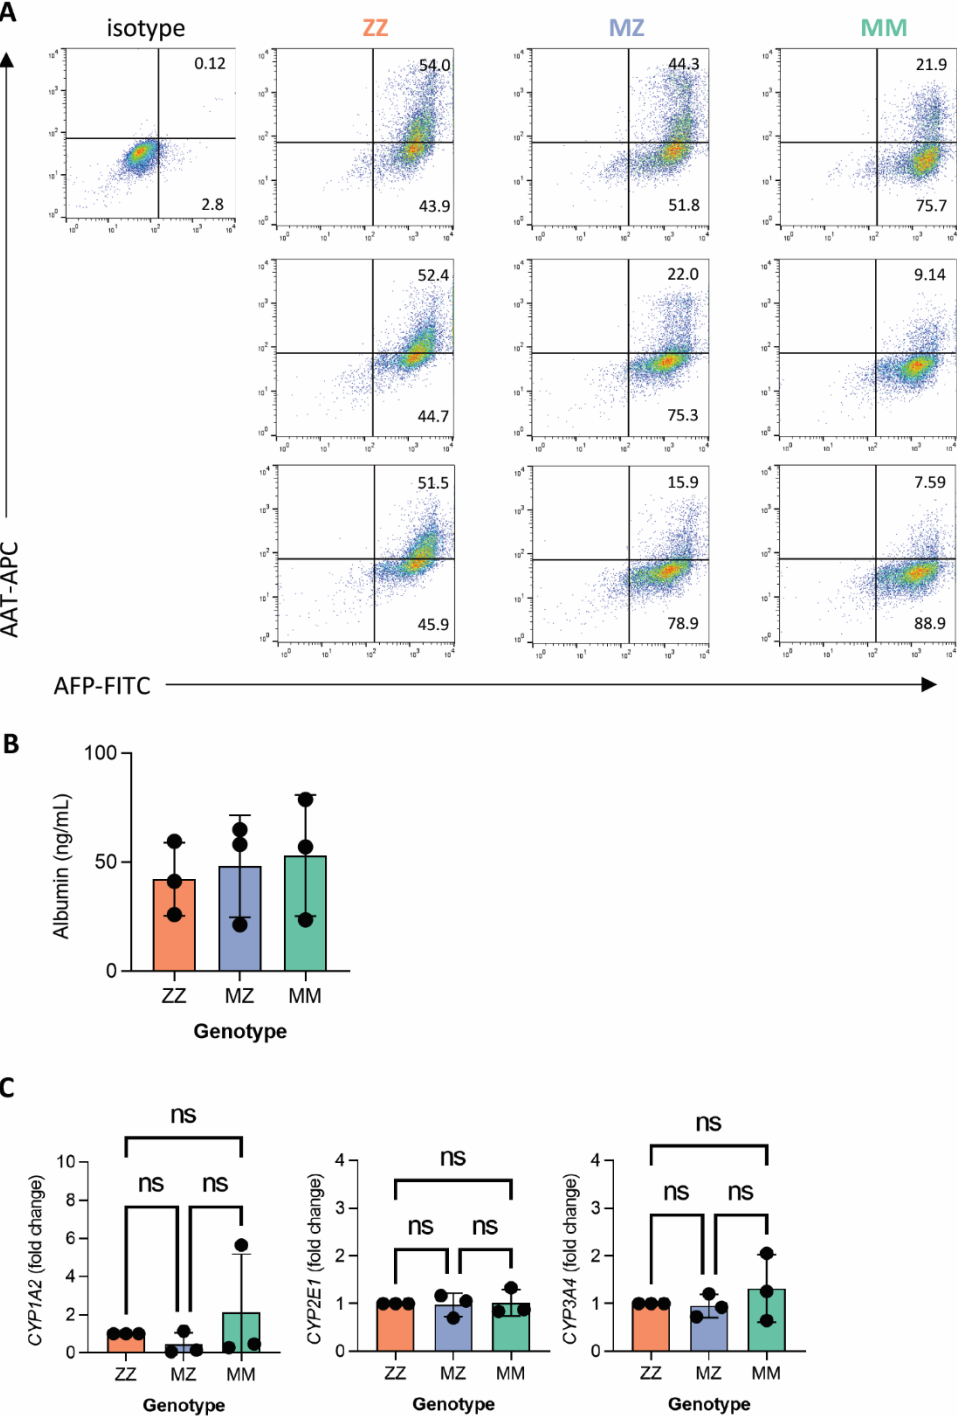

**Figure S3.** Relates to Figure 2. (A) Flow cytometry plots for AFP and AAT for three independent differentiations. (B) Albumin secretion. (C) *CYP1A2*, *CYP2E1* and *CYP3A4* expression.

### Supplemental Figure 4

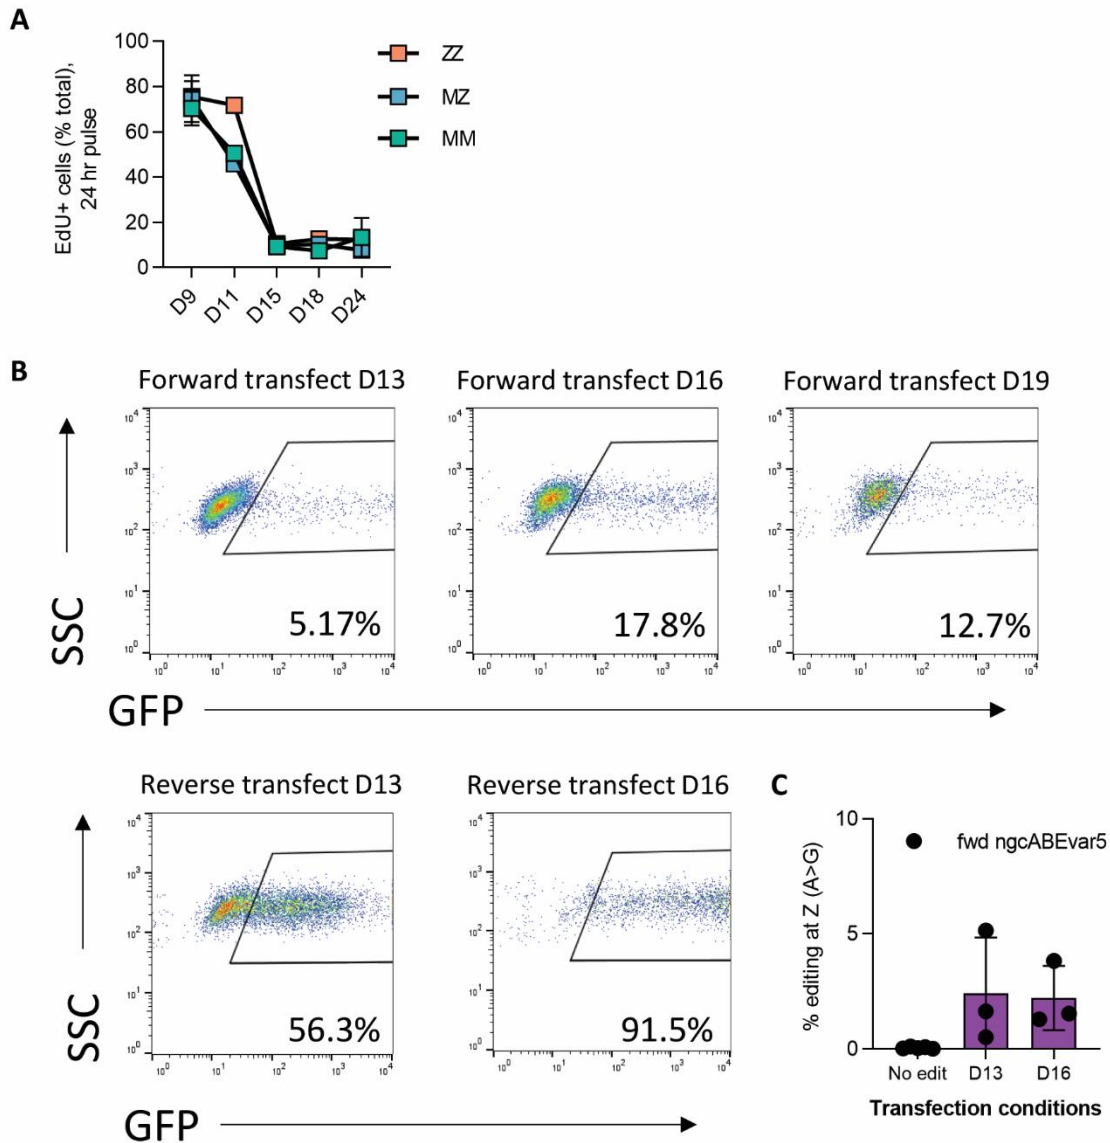

**Figure S4.** Relates to Figure 3 (A) EdU incorporation across the differentiation protocol in ZZ, MZ or MM cells. (B) Delivery of GFP-mRNA to iPSCs undergoing directed differentiation to hepatocytes. Cells were forward or reverse transfected on day 13, 16 or 19 of the differentiation protocol. (C) iHeps were forward transfected with *ngcABEvar5* base-editor on D13 or D16 of the directed differentiation protocol. Editing efficiency was assessed by Next Generation Sequencing (NGS) to quantify the correction of the Z mutation from A>G.

### Supplemental Figure 5

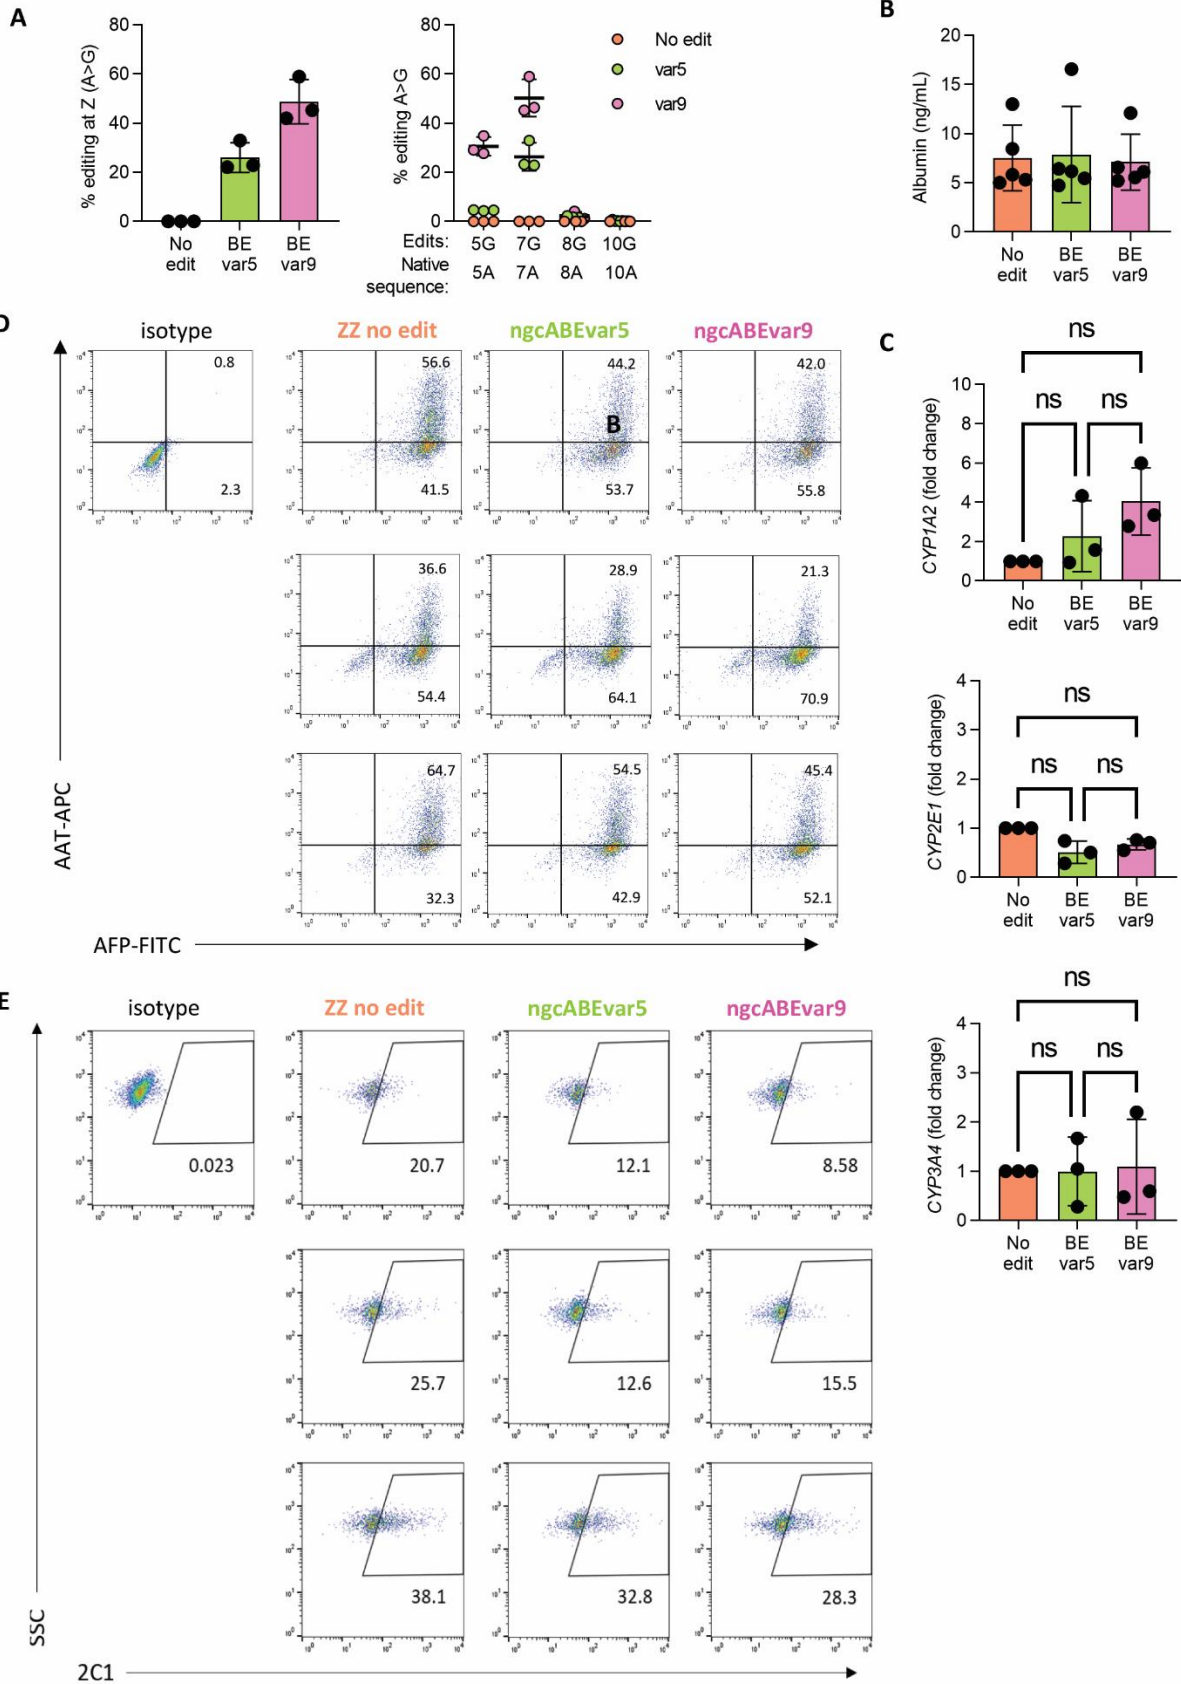

**Figure S5.** Relates to Figure 4. (A) Editing efficiency and bystander editing was assessed by Next Generation Sequencing to quantify the correction of the Z mutation from A>G. (B) Albumin secretion. (C) *CYP1A2*, *CYP2E1* and *CYP3A4* expression. (D) Flow cytometry plots for AFP and AAT for three independent differentiations. (E) Flow cytometry plots for 2C1 for three independent differentiations.



Supplemental Figure 6

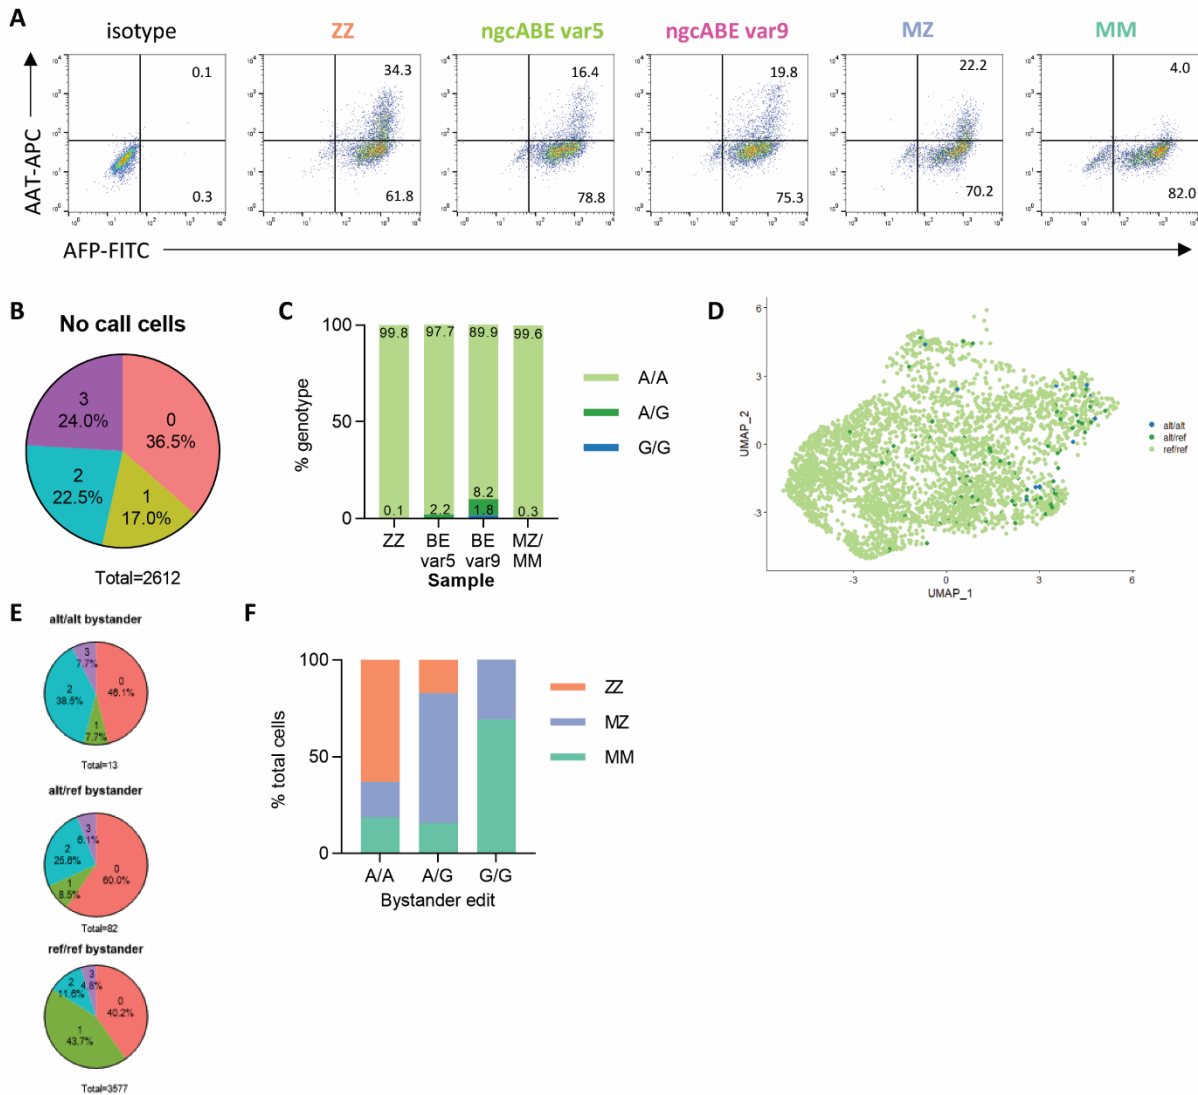

**Figure S6.** (A) Flow cytometry plots for AFP and AAT in cells that were used for single-cell RNA sequencing. (B) Distribution of cells across clusters without a genotype assigned by Vartrix. These cells were excluded for subsequent analyses. (C) Genotype of cells with bystander (D341G) edits. (D) UMAP projection of cells with bystander D341G edits. (E) Distribution of cells with bystander D341G edits across clusters. (F) Distribution of cells with bystander D341G edits by Z mutation status (ZZ, MZ or MM).

## Supplemental Figure 7

| CLUSTER 0                                                             | pval     | fdr      |
|-----------------------------------------------------------------------|----------|----------|
| GO_TRANSLATIONAL_INITIATION                                           | 2.60E-65 | 1.90E-61 |
| GO_COTRANSLATIONAL_PROTEIN_TARGETING_TO_MEMBRANE                      | 7.30E-63 | 2.80E-59 |
| GO_PROTEIN_LOCALIZATION_TO_ENDOPLASMIC_RETICULUM                      | 1.10E-59 | 2.00E-56 |
| GO_ESTABLISHMENT_OF_PROTEIN_LOCALIZATION_TO_ENDOPLASMIC_RETICULUM     | 1.30E-59 | 2.00E-56 |
| GO_NUCLEAR_TRANSCRIBED_MRNA_CATABOLIC_PROCESS_NONSENSE_MEDIATED_DECAY | 1.30E-59 | 2.00E-56 |
| GO_VIRAL_GENE_EXPRESSION                                              | 6.10E-51 | 7.70E-48 |
| GO_NUCLEAR_TRANSCRIBED_MRNA_CATABOLIC_PROCESS                         | 9.70E-51 | 1.00E-47 |
| GO_PROTEIN_TARGETING_TO_MEMBRANE                                      | 3.40E-48 | 3.20E-45 |
| GO_PEPTIDE_BIOSYNTHETIC_PROCESS                                       | 6.10E-48 | 5.10E-45 |
| GO_RNA_CATABOLIC_PROCESS                                              | 5.10E-46 | 3.80E-43 |
| GO_AMIDE_BIOSYNTHETIC_PROCESS                                         | 2.10E-44 | 1.40E-41 |
| GO_PEPTIDE_METABOLIC_PROCESS                                          | 2.60E-42 | 1.60E-39 |
| GO_ESTABLISHMENT_OF_PROTEIN_LOCALIZATION_TO_MEMBRANE                  | 1.10E-41 | 6.60E-39 |
| GO_CELLULAR_MACROMOLECULE_CATABOLIC_PROCESS                           | 3.10E-41 | 1.60E-38 |
| GO_CELLULAR_NITROGEN_COMPOUND_CATABOLIC_PROCESS                       | 1.10E-40 | 5.80E-38 |
| GO_INTERSPECIES_INTERACTION_BETWEEN_ORGANISMS                         | 3.20E-40 | 1.50E-37 |
| GO_MACROMOLECULE_CATABOLIC_PROCESS                                    | 1.10E-38 | 5.10E-36 |
| GO_ORGANIC_CYCLIC_COMPOUND_CATABOLIC_PROCESS                          | 1.70E-37 | 6.90E-35 |
| GO_ESTABLISHMENT_OF_PROTEIN_LOCALIZATION_TO_ORGANELLE                 | 1.90E-37 | 7.40E-35 |
| GO_CELLULAR_AMIDE_METABOLIC_PROCESS                                   | 7.90E-37 | 3.00E-34 |

  

| CLUSTER 1                                           | pval     | fdr      |
|-----------------------------------------------------|----------|----------|
| GO_PROTEIN_LIPID_COMPLEX_SUBUNIT_ORGANIZATION       | 2.00E-15 | 1.50E-11 |
| GO_PROTEIN_LIPID_COMPLEX_ASSEMBLY                   | 5.60E-15 | 1.70E-11 |
| GO_OXIDATION_REDUCTION_PROCESS                      | 7.00E-15 | 1.70E-11 |
| GO_SMALL_MOLECULE_METABOLIC_PROCESS                 | 6.90E-14 | 1.30E-10 |
| GO_RESPONSE_TO_INORGANIC_SUBSTANCE                  | 6.40E-13 | 9.70E-10 |
| GO_PROTEIN_CONTAINING_COMPLEX_REMODELING            | 2.00E-12 | 2.60E-09 |
| GO_DRUG_METABOLIC_PROCESS                           | 4.00E-12 | 4.30E-09 |
| GO_REGULATION_OF_PLASMA_LIPOPROTEIN_PARTICLE_LEVELS | 5.80E-12 | 5.00E-09 |
| GO_RESPONSE_TO_TOXIC_SUBSTANCE                      | 6.00E-12 | 5.00E-09 |
| GO_CHYLOMICRON_ASSEMBLY                             | 7.10E-12 | 5.40E-09 |
| GO_ION_TRANSPORT                                    | 1.10E-11 | 7.60E-09 |
| GO_ATP_METABOLIC_PROCESS                            | 1.50E-11 | 9.60E-09 |
| GO_HIGH_DENSITY_LIPOPROTEIN_PARTICLE_REMODELING     | 1.70E-11 | 1.00E-08 |
| GO_RESPONSE_TO_ABIOTIC_STIMULUS                     | 4.40E-11 | 2.30E-08 |
| GO_PHOSPHOLIPID_EFFLUX                              | 4.60E-11 | 2.30E-08 |
| GO_OXIDATIVE_PHOSPHORYLATION                        | 7.60E-11 | 3.50E-08 |
| GO_SECRETION                                        | 7.80E-11 | 3.50E-08 |
| GO_GENERATION_OF_PRECURSOR_METABOLITES_AND_ENERGY   | 1.10E-10 | 4.30E-08 |
| GO_NEGATIVE_REGULATION_OF_HYDROLASE_ACTIVITY        | 1.10E-10 | 4.30E-08 |
| GO_PLATELET_DEGRANULATION                           | 1.40E-10 | 5.30E-08 |

  

| CLUSTER 2                                                 | pval     | fdr      |
|-----------------------------------------------------------|----------|----------|
| GO_ACTIN_FILAMENT_BASED_PROCESS                           | 2.80E-47 | 2.10E-43 |
| GO_CYTOSKELETON_ORGANIZATION                              | 2.10E-44 | 7.70E-41 |
| GO_BIOLOGICAL_ADHESION                                    | 1.50E-37 | 3.80E-34 |
| GO_CELLULAR_COMPONENT_MORPHOGENESIS                       | 1.90E-36 | 3.50E-33 |
| GO_SUPRAMOLECULAR_FIBER_ORGANIZATION                      | 7.00E-36 | 1.10E-32 |
| GO_LOCOMOTION                                             | 3.60E-34 | 4.60E-31 |
| GO_CELL_MOTILITY                                          | 1.30E-30 | 1.40E-27 |
| GO_CELL_PROJECTION_ORGANIZATION                           | 6.30E-30 | 5.90E-27 |
| GO_ACTIN_FILAMENT_ORGANIZATION                            | 1.40E-29 | 1.20E-26 |
| GO_REGULATION_OF_ANATOMICAL_STRUCTURE_MORPHOGENESIS       | 1.60E-28 | 1.20E-25 |
| GO_EXOCYTOSIS                                             | 4.80E-27 | 3.30E-24 |
| GO_ENZYME_LINKED_RECEPTOR_PROTEIN_SIGNALING_PATHWAY       | 6.60E-27 | 4.10E-24 |
| GO_NEGATIVE_REGULATION_OF_RESPONSE_TO_STIMULUS            | 1.10E-25 | 6.20E-23 |
| GO_REGULATION_OF_CELLULAR_COMPONENT_MOVEMENT              | 1.00E-24 | 5.50E-22 |
| GO_CELL_ACTIVATION                                        | 1.10E-24 | 5.50E-22 |
| GO_NEGATIVE_REGULATION_OF_SIGNALING                       | 2.80E-24 | 1.20E-21 |
| GO_REGULATION_OF_ACTIN_FILAMENT_BASED_PROCESS             | 2.80E-24 | 1.20E-21 |
| GO_SECRETION                                              | 2.90E-24 | 1.20E-21 |
| GO_REGULATION_OF_CELL_DEATH                               | 5.80E-24 | 2.30E-21 |
| GO_POSITIVE_REGULATION_OF_CELLULAR_COMPONENT_ORGANIZATION | 6.00E-24 | 2.30E-21 |

  

| CLUSTER 3                                                    | pval     | fdr      |
|--------------------------------------------------------------|----------|----------|
| GO_RESPONSE_TO_ENDOPLASMIC_RETICULUM_STRESS                  | 6.50E-30 | 4.90E-26 |
| GO_SECRETION                                                 | 2.70E-29 | 1.00E-25 |
| GO_EXTRACELLULAR_STRUCTURE_ORGANIZATION                      | 1.90E-28 | 4.70E-25 |
| GO_INTRACELLULAR_TRANSPORT                                   | 3.50E-26 | 6.60E-23 |
| GO_CELLULAR_MACROMOLECULE_LOCALIZATION                       | 1.30E-25 | 1.90E-22 |
| GO_EXOCYTOSIS                                                | 1.50E-25 | 1.90E-22 |
| GO_CELL_ACTIVATION                                           | 1.30E-22 | 1.40E-19 |
| GO_RESPONSE_TO_TOPOLOGICALLY_INCORRECT_PROTEIN               | 1.70E-21 | 1.60E-18 |
| GO_MYELOID_LEUKOCYTE_ACTIVATION                              | 5.50E-20 | 4.60E-17 |
| GO_ENDOPLASMIC_RETICULUM_TO_GOLGI_VESICLE_MEDIATED_TRANSPORT | 3.60E-19 | 2.70E-16 |
| GO_MYELOID_LEUKOCYTE_MEDIATED_IMMUNITY                       | 4.70E-19 | 3.20E-16 |
| GO_BIOLOGICAL_ADHESION                                       | 2.00E-18 | 1.20E-15 |
| GO_PROTEOLYSIS                                               | 4.50E-18 | 2.60E-15 |
| GO_CELL_ACTIVATION_INVOLVED_IN_IMMUNE_RESPONSE               | 5.20E-18 | 2.80E-15 |
| GO_CELLULAR_RESPONSE_TO_TOPOLOGICALLY_INCORRECT_PROTEIN      | 6.30E-18 | 3.10E-15 |
| GO_RESPONSE_TO_NITROGEN_COMPOUND                             | 8.20E-18 | 3.90E-15 |
| GO_CELL_MOTILITY                                             | 1.50E-17 | 6.50E-15 |
| GO_RESPONSE_TO_WOUNDING                                      | 1.60E-17 | 6.70E-15 |
| GO_ENDOPLASMIC_RETICULUM_UNFOLDED_PROTEIN_RESPONSE           | 1.80E-17 | 7.00E-15 |
| GO_CELL_JUNCTION_ORGANIZATION                                | 2.70E-17 | 1.00E-14 |

**Figure S7.** Gene-set enrichment analysis (GSEA) for each cluster.

# Supplemental Figure 8

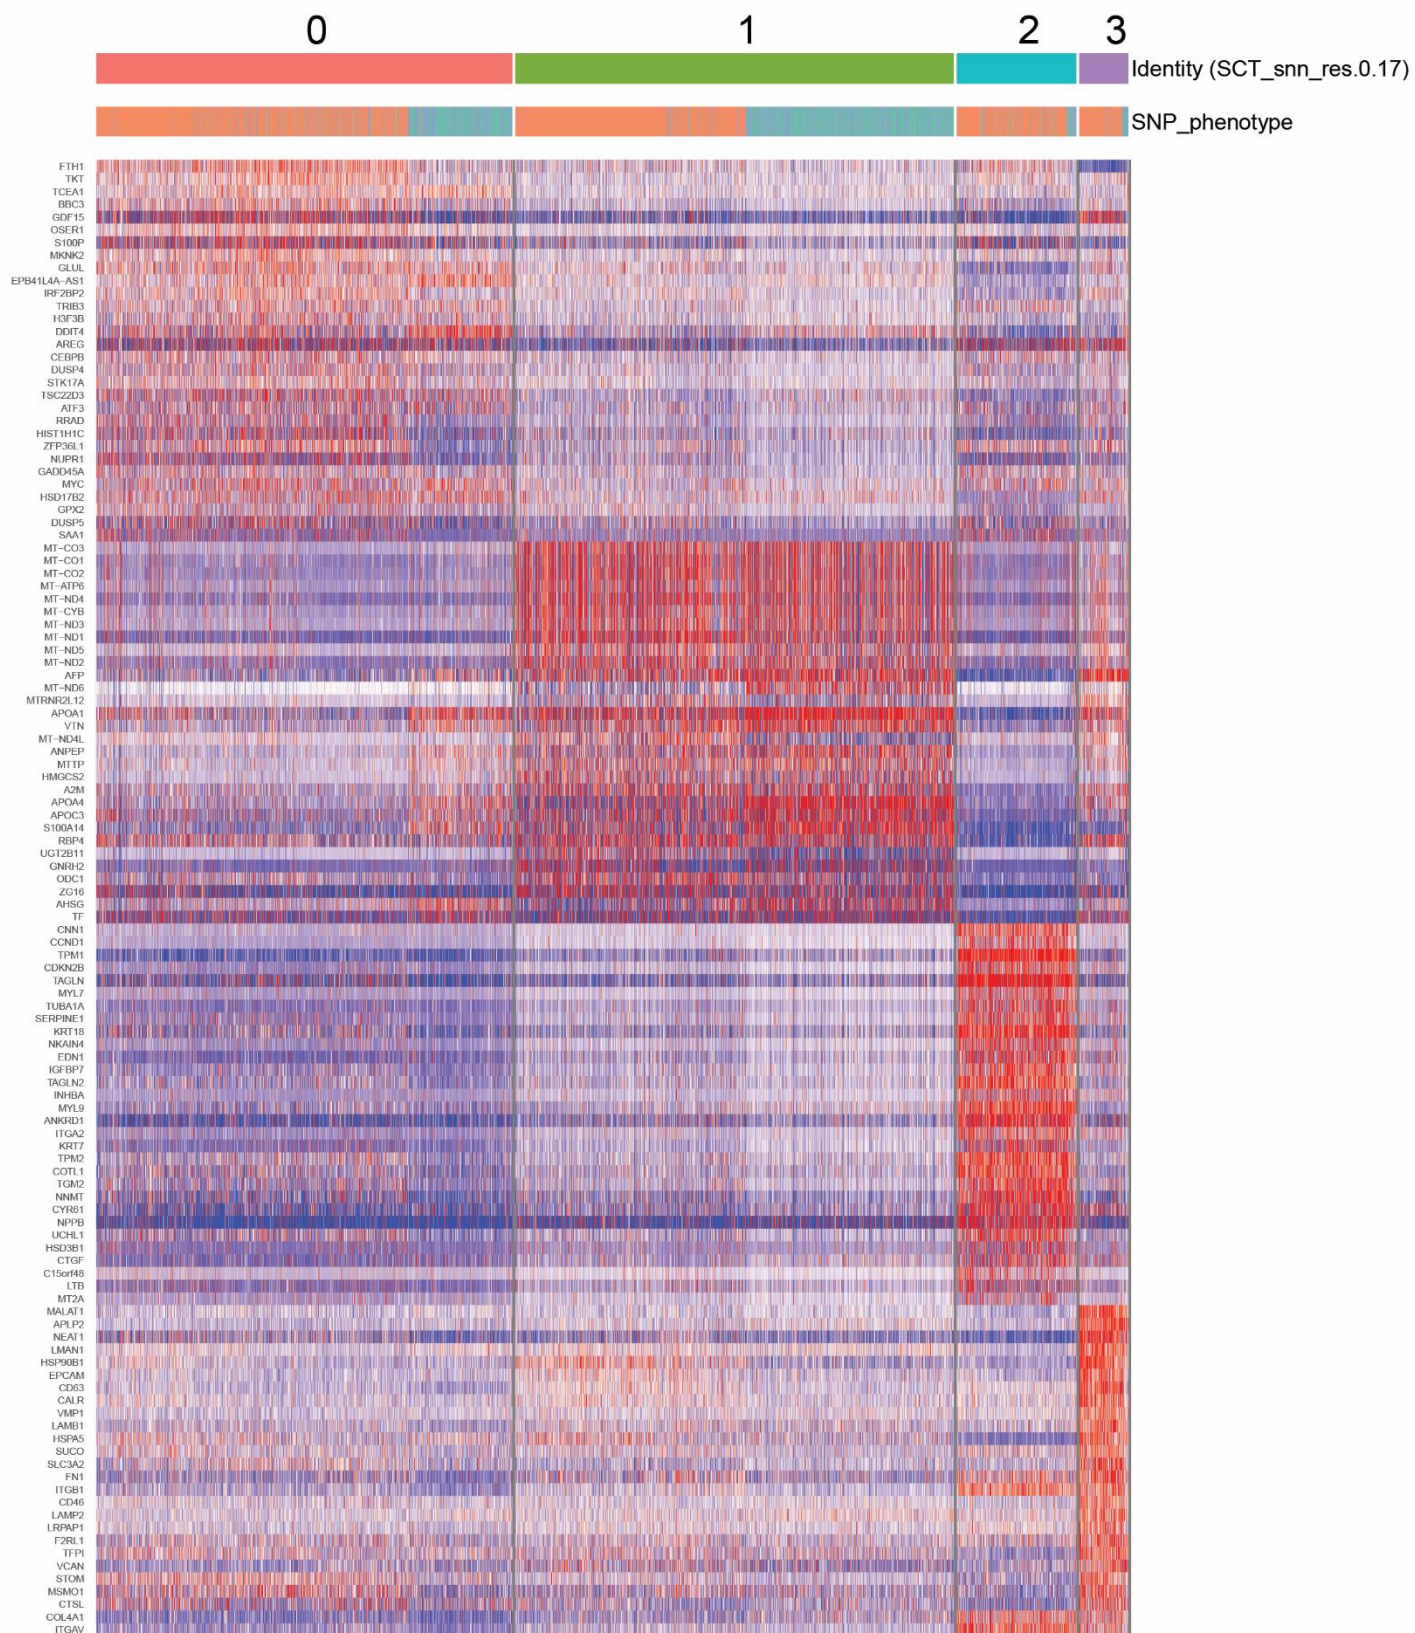

**Figure S8.** Top 30 differentially expressed genes across clusters.

**Supplemental Table 1.** Relates to Figure 1. Next generation sequencing of base-edited iPSC clones.

**Supplemental Table 2.** Relates to Figure 3. Next generation sequencing of base-edited iPSC-derived hepatocytes.

**Supplemental Table 3.** Relates to Figure 4. Next generation sequencing of base-edited iPSC-derived hepatocytes.

**Supplemental Table 4.** Relates to Figure 5. Next generation sequencing of base-edited iPSC-derived hepatocytes.

**Supplemental Table 5.** Primer sequences used in this study.

**Supplemental Table 6.** ngcABE mRNA template sequences used in this study.

**Supplemental Table 7.** gRNA sequences used in this study.

**Supplemental Table 8.** Whole genome sequencing statistical output from VarScan and Mutect2 of passage matched samples (ZZ, ZZ cells that were nucleofected without editors, MZ and MM) compared to earlier passage ZZ cells (the same passage used to commence base-editing).
